# Supplementary material
Source: MDPI journal article supplement (https://www.mdpi.com/2073-4344/13/4/751)
Supplement: s1 [file s1]

# Band Gap Engineering in Quadruple-Layered Sillén–Aurivillius Perovskite Oxychlorides $\text{Bi}_7\text{Fe}_2\text{Ti}_2\text{O}_{17}\text{X}$ ( $\text{X} = \text{Cl}, \text{Br}, \text{I}$ ) for Enhanced Photocatalytic Performance

Jikun Chen <sup>1,†</sup>, Yan Gu <sup>1,†</sup>, Shishi Xu <sup>1</sup>, Yunxiang Zhang <sup>1,\*</sup>, Zhe Zhang <sup>1</sup>, Lin Shi <sup>1</sup>, Zhichao Mu <sup>1</sup>, Chenliang Zhou <sup>1</sup>, Jiali Zhang <sup>1</sup> and Qinfang Zhang <sup>1,2,\*</sup>

<sup>1</sup> School of Materials Science and Engineering, Yancheng Institute of Technology, Yancheng 224001, China

<sup>2</sup> Jiangsu Provincial Key Laboratory of Eco-Environmental Materials, Yancheng Institute of Technology, Yancheng 224051, China

\* Correspondence: chzyx123@163.com (Y.Z.); qfangzhang@gmail.com (Q.Z.)

## Figure Captions

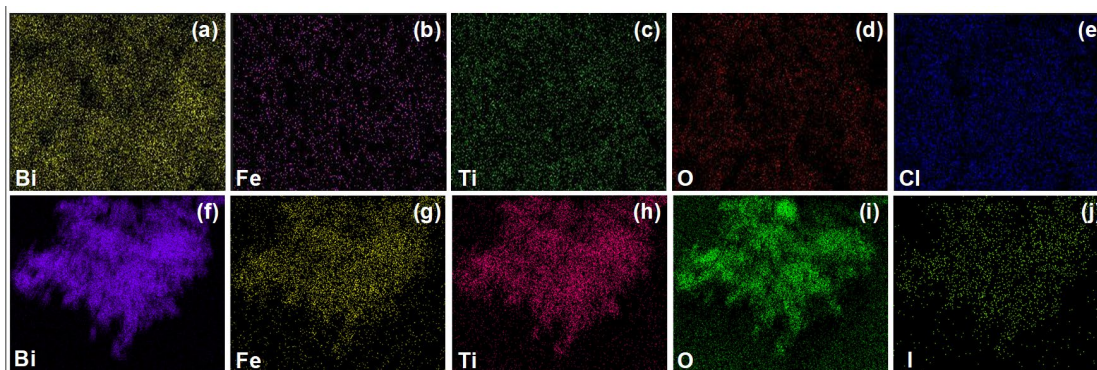

**Figure S1.** The SEM-EDS elemental mappings of (a) Bi, (b) Fe, (c) Ti, (d) O, and (e) Br for BFTOC sample. The SEM-EDS elemental mappings of (f) Bi, (g) Fe, (h) Ti, (i) O, and (j) Br for BFTOI sample

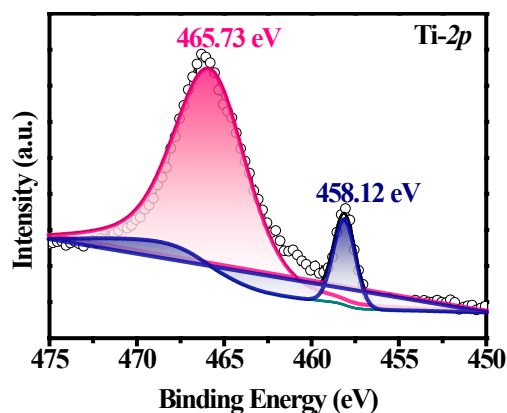

**Figure S2.** Ti 2p XPS spectrum of the BFTO-Br sample.

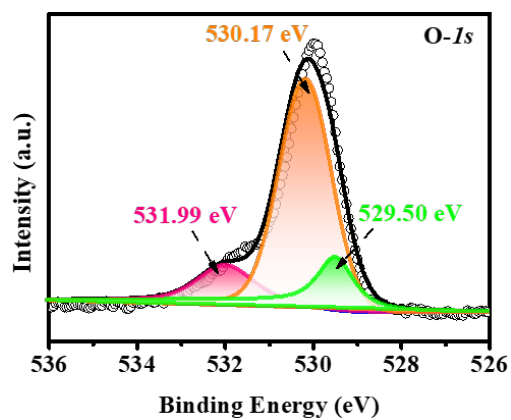

**Figure S3.** O 1s XPS spectrum of the BFTO-Br sample.

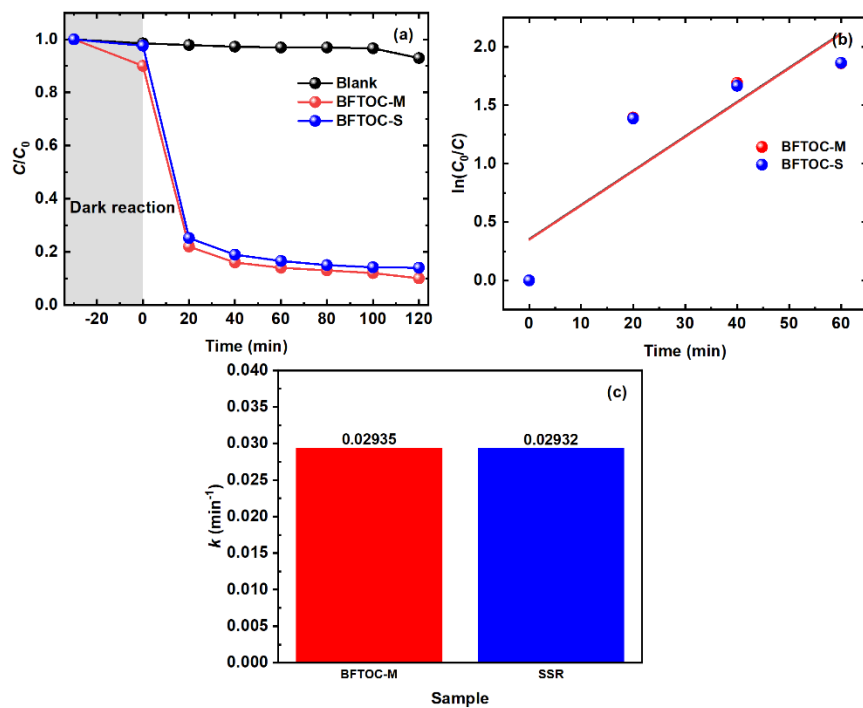

**Figure S4.** The experiment about tetracycline (TC) degradation over BFTOB.

**Table S1** The average CO production rates of BFTOX at different times.

| Sample  | BFTOC | BFTOB | BFTOI |
|---------|-------|-------|-------|
| 1       | 3.74  | 3.60  | 2.66  |
| 2       | 3.11  | 2.98  | 2.40  |
| 3       | 2.51  | 2.31  | 2.10  |
| Average | 3.12  | 2.96  | 2.39  |
